# Supplementary material
Source: HighWire-hosted journal article supplement (https://lupus.bmj.com/content/3/1/e000159)
Supplement: inline-supplementary-material-2 [file inline-supplementary-material-2.xls]

## Sheet: Supplementary Table 1. 
geneSymbol	geneName	logFC	P.Value	adj.P.Val
OTOF	otoferlin	1.88604	3.26443e-05	3.26443e-05
IGLL1	immunoglobulin lambda-like polypeptide 1	1.79133	0.000542652	0.000542652
IFIT1	interferon-induced protein with tetratricopeptide repeats 1	1.65924	0.00385758	0.00385758
RSAD2	radical S-adenosyl methionine domain containing 2	1.57003	0.000773647	0.000773647
ISG15	ISG15 ubiquitin-like modifier	1.52312	0.00309136	0.00309136
IGJ	immunoglobulin J polypeptide, linker protein for immunoglobulin alpha and mu polypeptides	1.4531	0.00152765	0.00152765
IFIT3	interferon-induced protein with tetratricopeptide repeats 3	1.32324	0.00112678	0.00112678
HES4	hairy and enhancer of split 4 (Drosophila)	1.31569	8.70619e-05	8.70619e-05
IFI44L	interferon-induced protein 44-like	1.31314	0.0180526	0.0180526
HERC5	HECT and RLD domain containing E3 ubiquitin protein ligase 5	1.20433	0.00696869	0.00696869
IFIT3	interferon-induced protein with tetratricopeptide repeats 3	1.1908	0.00741218	0.00741218
OAS2	2'-5'-oligoadenylate synthetase 2, 69/71kDa	1.17936	0.00248423	0.00248423
IFI44	interferon-induced protein 44	1.17243	0.00482041	0.00482041
OAS1	2'-5'-oligoadenylate synthetase 1, 40/46kDa	1.15602	0.000924975	0.000924975
IFI44L	interferon-induced protein 44-like	1.10619	1.51933e-05	1.51933e-05
OAS3	2'-5'-oligoadenylate synthetase 3, 100kDa	1.10045	0.00422557	0.00422557
MX1	myxovirus (influenza virus) resistance 1, interferon-inducible protein p78 (mouse)	1.06112	0.0118787	0.0118787
IFIT2	interferon-induced protein with tetratricopeptide repeats 2	1.03066	0.00427287	0.00427287
IFIT3	interferon-induced protein with tetratricopeptide repeats 3	1.00866	0.00961197	0.00961197
OASL	2'-5'-oligoadenylate synthetase-like	0.992829	0.00320471	0.00320471
SPATS2L	spermatogenesis associated, serine-rich 2-like	0.955634	0.000197891	0.000197891
IFI6	interferon, alpha-inducible protein 6	0.946665	0.0321988	0.0321988
OAS1	2'-5'-oligoadenylate synthetase 1, 40/46kDa	0.926781	0.0105118	0.0105118
OAS2	2'-5'-oligoadenylate synthetase 2, 69/71kDa	0.913882	0.000185568	0.000185568
LY6E	lymphocyte antigen 6 complex, locus E	0.901571	0.0495803	0.0495803
XAF1	XIAP associated factor 1	0.868921	0.00912875	0.00912875
OAS1	2'-5'-oligoadenylate synthetase 1, 40/46kDa	0.846709	0.0196842	0.0196842
HERC6	HECT and RLD domain containing E3 ubiquitin protein ligase family member 6	0.817112	0.00166132	0.00166132
FTH1P12	ferritin, heavy polypeptide 1 pseudogene 12	0.801573	0.000496113	0.000496113
TXNDC5	thioredoxin domain containing 5 (endoplasmic reticulum)	0.791336	0.014968	0.014968
FTH1P8	ferritin, heavy polypeptide 1 pseudogene 8	0.770814	0.000318393	0.000318393
FTH1P12	ferritin, heavy polypeptide 1 pseudogene 12	0.763666	0.000113604	0.000113604
USP18	ubiquitin specific peptidase 18	0.759709	4.63108e-05	4.63108e-05
TXNDC5	thioredoxin domain containing 5 (endoplasmic reticulum)	0.758771	0.0110232	0.0110232
IRF7	interferon regulatory factor 7	0.756672	0.00466989	0.00466989
IFIT1	interferon-induced protein with tetratricopeptide repeats 1	0.75005	1.60479e-05	1.60479e-05
TMEM123	transmembrane protein 123	0.737145	0.00203619	0.00203619
EIF2AK2	eukaryotic translation initiation factor 2-alpha kinase 2	0.718817	0.00884527	0.00884527
MX2	myxovirus (influenza virus) resistance 2 (mouse)	0.706164	0.000646299	0.000646299
MZB1	marginal zone B and B1 cell-specific protein	0.703554	0.0174924	0.0174924
OTOF	otoferlin	0.69257	1.52059e-05	1.52059e-05
IRF7	interferon regulatory factor 7	0.687002	0.00509462	0.00509462
DHX58	DEXH (Asp-Glu-X-His) box polypeptide 58	0.686495	3.04792e-05	3.04792e-05
PARP12	poly (ADP-ribose) polymerase family, member 12	0.666169	0.00883337	0.00883337
IFIH1	interferon induced with helicase C domain 1	0.655026	0.0210908	0.0210908
FTH1P2	ferritin, heavy polypeptide 1 pseudogene 2	0.648586	0.00105678	0.00105678
IFIT5	interferon-induced protein with tetratricopeptide repeats 5	0.636715	8.44036e-05	8.44036e-05
SAMD9	sterile alpha motif domain containing 9	0.634902	0.00315955	0.00315955
CMPK2	cytidine monophosphate (UMP-CMP) kinase 2, mitochondrial	0.632813	0.000341482	0.000341482
DDX60	DEAD (Asp-Glu-Ala-Asp) box polypeptide 60	0.628611	0.00536558	0.00536558
RNASE6	ribonuclease, RNase A family, k6	0.622737	0.00060251	0.00060251
SEC11C	SEC11 homolog C (S. cerevisiae)	0.618488	0.00816864	0.00816864
OASL	2'-5'-oligoadenylate synthetase-like	0.616944	0.000201345	0.000201345
MT1A	metallothionein 1A	0.610027	0.0260293	0.0260293
JUP	junction plakoglobin	0.597023	0.00525193	0.00525193
TMEM154	transmembrane protein 154	0.595355	0.00341117	0.00341117
ZBP1	Z-DNA binding protein 1	0.595297	0.0425239	0.0425239
HSH2D	hematopoietic SH2 domain containing	0.590613	0.000959819	0.000959819
HELZ2	helicase with zinc finger 2, transcriptional coactivator	0.588824	0.00500902	0.00500902
RTP4	receptor (chemosensory) transporter protein 4	0.58621	0.00367748	0.00367748
UPP1	uridine phosphorylase 1	-0.591654	0.0134454	0.0134454
GYG1	glycogenin 1	-0.591848	0.0183419	0.0183419
GPR84	G protein-coupled receptor 84	-0.599036	0.00243635	0.00243635
DYSF	dysferlin, limb girdle muscular dystrophy 2B (autosomal recessive)	-0.600731	0.0196663	0.0196663
CST7	cystatin F (leukocystatin)	-0.629594	0.043651	0.043651
HK3	hexokinase 3 (white cell)	-0.631788	0.00788799	0.00788799
MMP8	matrix metallopeptidase 8 (neutrophil collagenase)	-0.634625	0.0263402	0.0263402
TSPO	translocator protein (18kDa)	-0.643069	0.00200305	0.00200305
FCGR1B	Fc fragment of IgG, high affinity Ib, receptor (CD64)	-0.643216	0.0294276	0.0294276
SIGLEC14	sialic acid binding Ig-like lectin 14	-0.657288	0.0128431	0.0128431
FCGR1A	Fc fragment of IgG, high affinity Ia, receptor (CD64)	-0.683104	0.00615195	0.00615195
FCER1G	Fc fragment of IgE, high affinity I, receptor for; gamma polypeptide	-0.705786	0.000162461	0.000162461
TSPO	translocator protein (18kDa)	-0.728692	0.00256886	0.00256886
LTA4H	leukotriene A4 hydrolase	-0.749095	0.000386778	0.000386778
LCN2	lipocalin 2	-0.762713	0.0489832	0.0489832
CD177	CD177 molecule	-0.793019	0.0169725	0.0169725
CD177	CD177 molecule	-0.795836	0.0116179	0.0116179
ANKRD22	ankyrin repeat domain 22	-0.816495	0.000863801	0.000863801
LILRA3	leukocyte immunoglobulin-like receptor, subfamily A (without TM domain), member 3	-0.833122	0.0359279	0.0359279
ANKRD22	ankyrin repeat domain 22	-0.835289	0.000283027	0.000283027
TSPO	translocator protein (18kDa)	-0.849027	0.000263993	0.000263993
C19orf59	chromosome 19 open reading frame 59	-0.878926	0.0143329	0.0143329
PGLYRP1	peptidoglycan recognition protein 1	-0.882367	0.0179774	0.0179774
ZDHHC19	zinc finger, DHHC-type containing 19	-0.932891	0.0232449	0.0232449
